# Supplementary material
Source: publisher site journal article supplement (https://www.dovepress.com/article/392417)
Supplement: Supplementary file 1 [file get_supplementary_file.php]

Supplementary Table 1 PubMed search strategy

| # | Search terms | Results |
| --- | --- | --- |
| 1 | cardiac rehabilitation[MeSH Terms] | 3,373 |
| 2 | cardiac rehab*[Title/Abstract] OR cardiovascular rehab*[Title/Abstract] | 7,965 |
| 3 | #1 OR #2 | 8,924 |
| 4 | Myocardial Ischemia[MeSH Terms] | 458,701 |
| 5 | Coronary Artery Disease[MeSH Terms] | 71,291 |
| 6 | Acute Coronary Syndrome[MeSH Terms] | 18,766 |
| 7 | Myocardial Infarction[MeSH Terms] | 187,847 |
| 8 | Angina Pectoris[MeSH Terms] | 44,330 |
| 9 | Percutaneous Coronary Intervention[MeSH Terms] | 61,633 |
| 10 | Coronary Artery Bypass[MeSH Terms] | 55,608 |
| 11 | myocardial ischemia[Title/Abstract] OR ischemic heart disease*[Title/Abstract] OR heart disease*[Title/Abstract] OR heart attack[Title/Abstract] OR cardiovascular disease*[Title/Abstract] OR coronary heart disease*[Title/Abstract] OR coronary artery disease*[Title/Abstract] OR coronary disease*[Title/Abstract] OR acute coronary syndrom*[Title/Abstract] OR myocardial infarction[Title/Abstract] OR angina*[Title/Abstract] OR percutaneous coronary intervention*[Title/Abstract] OR percutaneous coronary revascularization*[Title/Abstract] OR percutaneous transluminal coronary angioplast*[Title/Abstract] OR coronary balloon angioplast*[Title/Abstract] OR coronary artery bypass*[Title/Abstract] | 725,164 |
| 12 | #4 OR #5 OR #6 OR #7 OR #8 OR #9 OR #10 OR #11 | 893,145 |
| 13 | Rehabilitation[MeSH Terms] | 338,807 |
| 14 | rehabilitation[Title/Abstract] OR rehab*[Title/Abstract] | 204,428 |
| 15 | #13 OR #14 | 481,072 |
| 16 | #12 AND #15 | 17,896 |
| 17 | #3 OR #16 | 21,014 |
| 18 | patient preference*[Title/Abstract] OR patient choice*[Title/Abstract] OR stated preference*[Title/Abstract] OR acceptable risk[Title/Abstract] OR acceptable benefit[Title/Abstract] OR marginal rate of substitute[Title/Abstract] OR attribute importance[Title/Abstract] OR person trade off[Title/Abstract] OR PTO[Title/Abstract] OR willingness to pay[Title/Abstract] OR WTP[Title/Abstract] OR part worth utilities[Title/Abstract] OR paired comparisons[Title/Abstract] OR pairwise choices[Title/Abstract] OR functional measurement[Title/Abstract] | 25,453 |
| 19 | choice behavior[Title/Abstract] OR discrete choice[Title/Abstract] OR discrete-choice[Title/Abstract] OR discrete choice experiment[Title/Abstract] OR choice experiment[Title/Abstract] OR DCE[Title/Abstract] OR conjoint experiment[Title/Abstract] OR discrete rank*[Title/Abstract] OR conjoint analysis[Title/Abstract] OR conjoint measurement[Title/Abstract] OR conjoint choice experiment[Title/Abstract] OR adaptive conjoint analysis[Title/Abstract] OR adaptive choice based conjoint[Title/Abstract] OR multi-criteria decision analysis[Title/Abstract] OR multicriteria decision analysis[Title/Abstract] OR benefit risk[Title/Abstract] | 17,498 |
| 20 | #18 OR #19 | 41,160 |
| 21 | #17 AND #20 | 65 |
